# Supplementary material for: Trauma and Posttraumatic Stress in Unaccompanied Young Refugees During Their Flight: A Longitudinal Cross-Country Study
Source: Research Square preprint supplement (doi:10.21203/rs.3.rs-1174857/v1), 2021-12-21
Supplement: Supplementary file 1 [file 753f6c804a5b956de6365e52.docx]

| **Online Supplement (SP1)**  *Number of missing data for each measurement and time point* | | | |  |
| --- | --- | --- | --- | --- |
|  | PTSD  n (%) | Trauma*  n (%) | Daily stressors  n (%) | | |
| M1 | 2 (1) | 14 (7.49) | 14 (7.49) | | |
| M2 | 39 (20.186) | 51 (27.27) | 38 (20.32) | | |
| M3 | 79 (42.25) | 80 (42.78) | 79 (42.24) | | |
| *trauma includes pre-migration, peri-migration trauma and trauma in the host country as this was one questionnaire. | | | | | |
